# Supplementary material for: A novel azo dye molecule enables defect passivation and crystallization toward efficient perovskite solar cells
Source: Royal Society of Chemistry journal article supplement (doi:10.1039/d3tc00656e), 2023-01-01
Supplement: d3tc00656e1.pdf [file d3tc00656e1.pdf]

**A novel azo dye molecule enables defect passivation and crystallization  
toward efficient perovskite solar cells**

Ningxia Gu<sup>a</sup>, Ye Feng<sup>a</sup>, Lixin Song<sup>a,b,\*</sup>, Pengyun Zhang<sup>a</sup>, Pingfan Du<sup>a</sup>, Lei Ning<sup>a</sup>,  
Zeyuan Sun<sup>a</sup>, Hua Jiang<sup>a,\*</sup>, Jie Xiong<sup>a,c,\*</sup>

<sup>a</sup> College of Materials and Textiles, Zhejiang Sci-Tech University, Hangzhou 310018,  
Zhejiang, China

<sup>b</sup> Key Laboratory of Intelligent Textile and Flexible Interconnection of Zhejiang  
Province, Hangzhou 310018, Zhejiang, China

<sup>c</sup> School of Fashion Design & Engineering, Zhejiang Sci-Tech University, Hangzhou,  
311199, Zhejiang, China

\* Corresponding Authors: [lsxong12@zstu.edu.cn](mailto:lsxong12@zstu.edu.cn) (LX Song), [jh@zstu.edu.cn](mailto:jh@zstu.edu.cn) (H Jiang)  
and [jxiong@zstu.edu.cn](mailto:jxiong@zstu.edu.cn) (J Xiong)

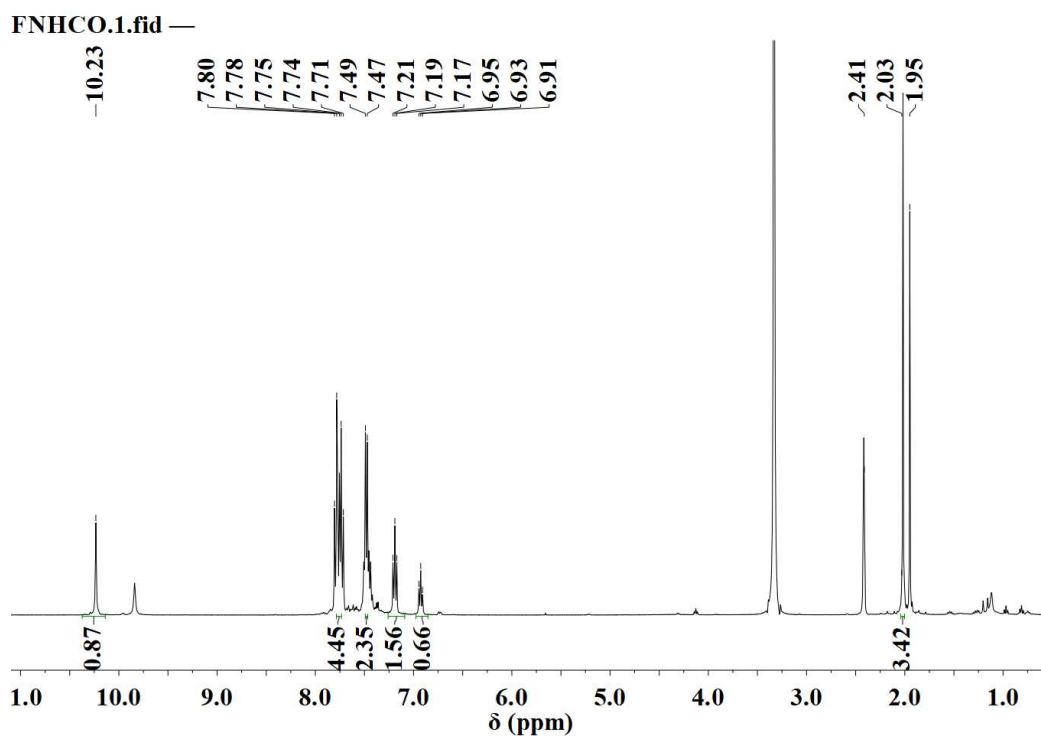

**Figure S1.** The  $^1\text{H}$  nuclear magnetic resonance (NMR) spectra of Ph-azo-PhAmi in DMSO- $d_6$ .

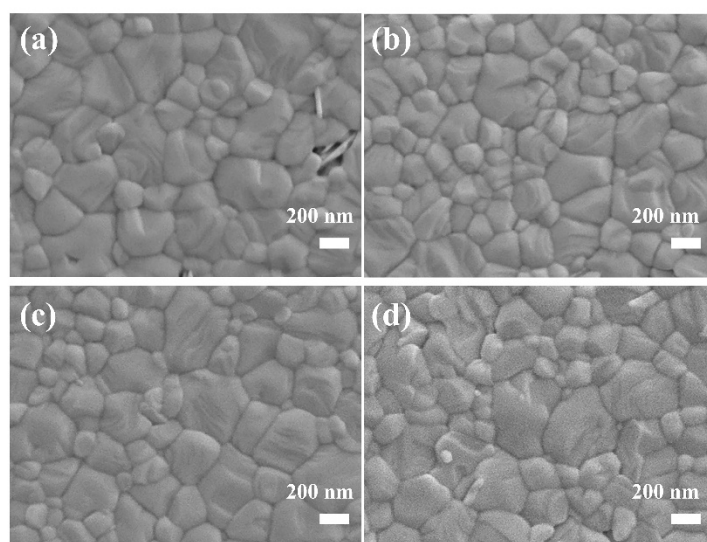

**Figure S2.** The SEM surface images of the perovskite film with (a) 0, (b) 0.05, (c) 0.1 and (d) 0.2 mg/mL Ph-azo-PhAmi.

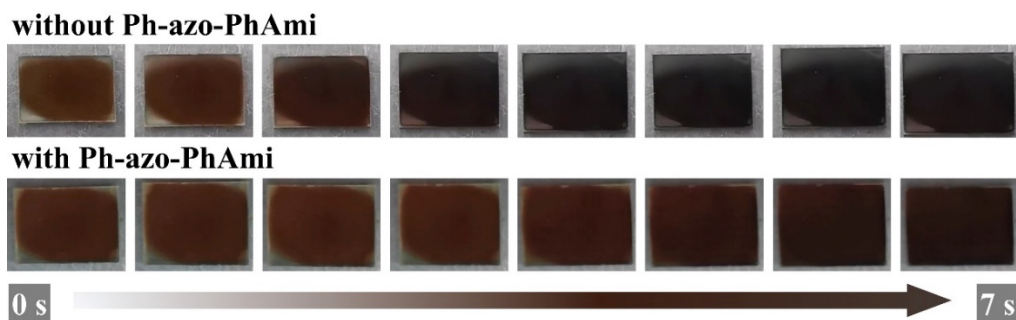

**Figure S3.** The morphological changes of perovskite films during annealing.

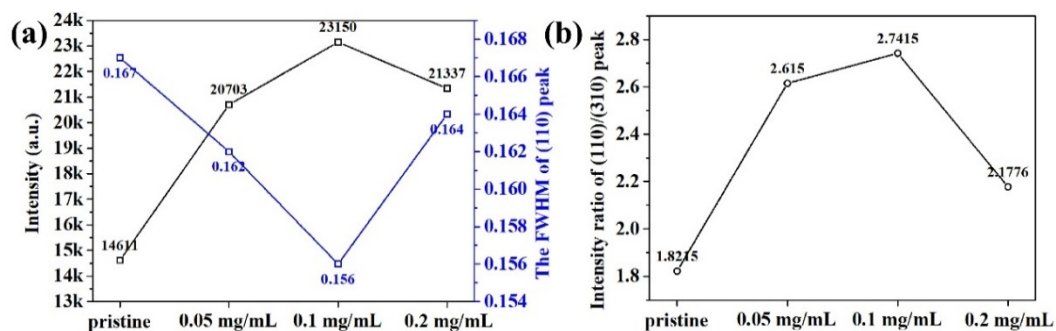

**Figure S4.** (a) The intensity and peak width at half height for the (110) peak of the perovskite. (b) The intensity ratio of (110)/(310) peak of the perovskite with different concentration of Ph-azo-PhAmi (0, 0.05, 0.1, 0.2 mg/mL).

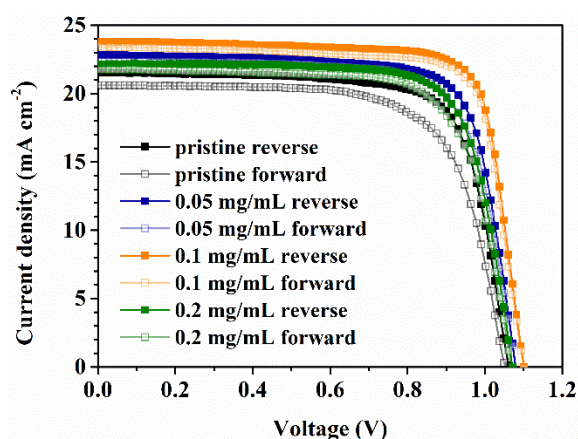

**Figure S5.** The J-V curves of the PSCs with different concentration of Ph-azo-PhAmi (0, 0.05, 0.1, 0.2 mg/mL).

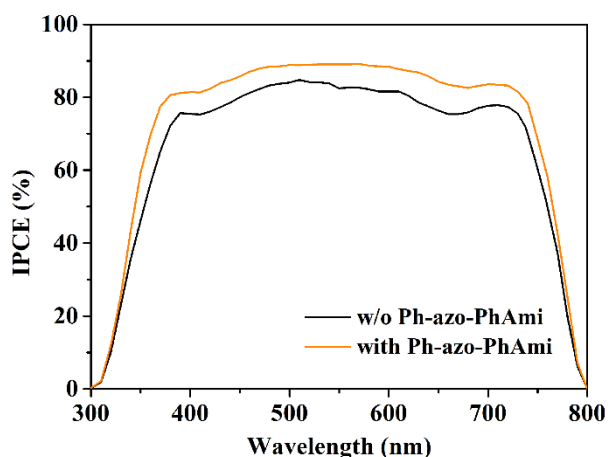

**Figure S6.** The IPCE spectra of the PSCs without and with 0.1 mg/mL Ph-azo-PhAmi.

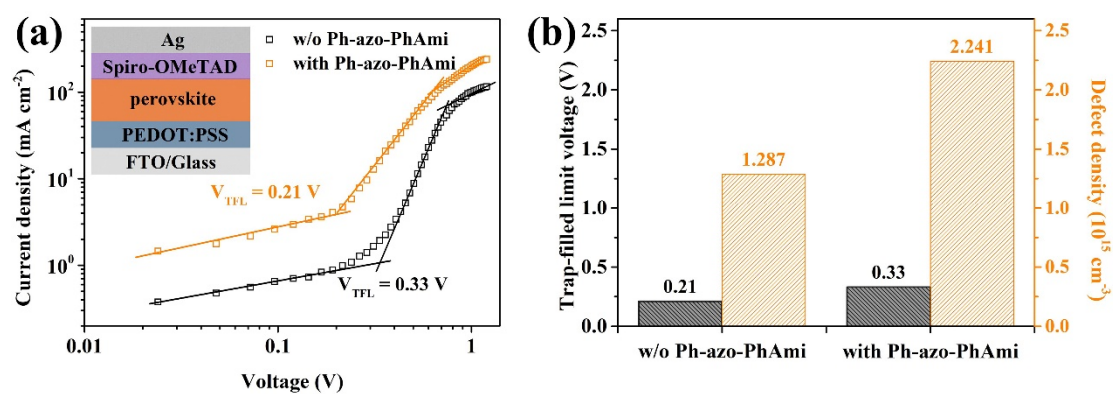

**Figure S7.** (a) The SCLC curves of electron-only PSCs (without and with Ph-azo-PhAmi) with the structure of FTO/PEDOT:PSS/MAPbI<sub>3</sub>/spiro-OMeTAD/Ag.

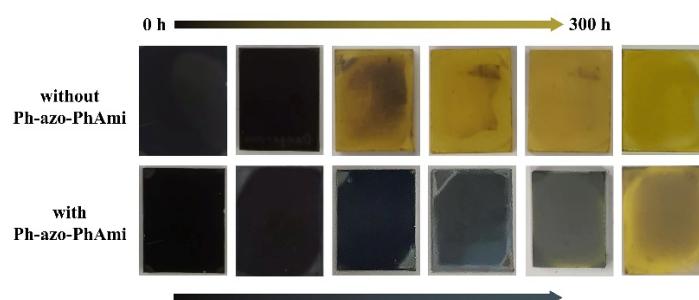

**Figure S8.** The morphology photographs for the perovskite films without and with Ph-azo-PhAmi under dark and humid air condition (in room temperature and RH: 65-75%) for 300 h without stress.

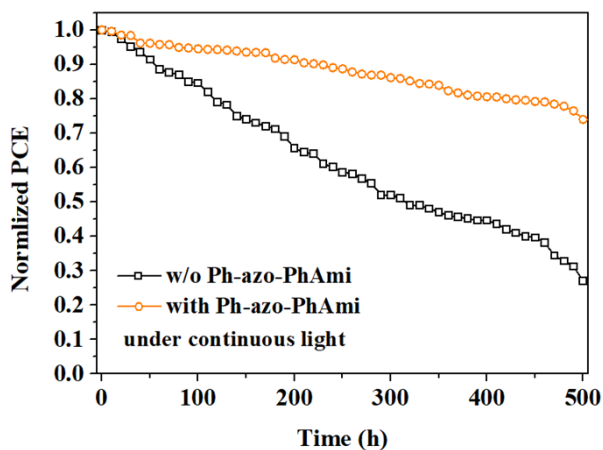

**Figure S9.** The light stability of devices without and with Ph-azo-PhAmi under continuous light soaking 100 mW/cm<sup>2</sup> for 500 h at room temperature (RH: 30±5%).

**Table S1.** Summary of PSCs fabricated in open air with different dye additives in literature.

| Additives | Categories               | Structures | Perovskite           | Anchor | PCE (%) | Ref |
|-----------|--------------------------|------------|----------------------|--------|---------|-----|
| AQ310     | organic dye              |            | FAMA<br>perovskite   | -COOH  | 19.43   | 1   |
| YD2-o-C8  | zinc<br>porphyrin<br>dye |            | CsFAMA<br>perovskite | -C=O   | 20.5    | 2   |
| N719      | organic dye              |            | FAMA<br>perovskite   | -C=O   | 19.6    | 3   |

|              |                 |                                                                                     |                                        |                                    |       |    |
|--------------|-----------------|-------------------------------------------------------------------------------------|----------------------------------------|------------------------------------|-------|----|
| FITC         | organic dye     | 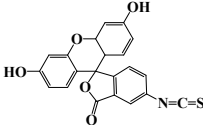   | CsPbI <sub>1.5</sub> Br <sub>1.5</sub> | -SCN                               | 14.05 | 4  |
| MM-3         | organic dyes    |    | CsFAMA                                 | -COOH                              | 20.31 | 5  |
| MM-4         |                 |                                                                                     | perovskite                             |                                    |       |    |
| MC1          | merocyanine dye |    | CsFAMA                                 | -CN                                | 20.31 | 6  |
|              |                 |                                                                                     | perovskite                             | -C=O                               |       |    |
| D102         | indoline dyes   |   |                                        |                                    | 3.97  |    |
| D131         |                 |                                                                                     | Cs <sub>2</sub> AgBiBr <sub>6</sub>    | -C=O                               | 2.57  | 7  |
| D149         |                 |                                                                                     |                                        |                                    | 4.23  |    |
| 8GFF         | fluorescent dye |  | MAPbI <sub>3</sub>                     | -C=O                               | 19.16 | 8  |
| Aza-DIPY     | organic dye     |  | MAPbI <sub>3</sub>                     | pyrrole,<br>benzene<br>ring and Cl | 19.71 | 9  |
| Coumarin 343 | organic dye     |  | FACs                                   | -C=O                               | 20.9  | 10 |
| Indigo       | organic dye     |  | CsFAMA                                 | -C=O                               | 23.22 | 11 |
|              |                 |                                                                                     | perovskite                             | -N-H                               |       |    |

|                  |           |                                                                                   |                    |      |       |              |
|------------------|-----------|-----------------------------------------------------------------------------------|--------------------|------|-------|--------------|
| Th-azi-Pyr       | hydrazone | 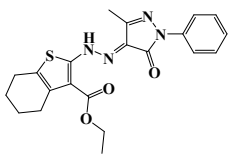 | MAPbI <sub>3</sub> | -C=O | 19.27 | 12           |
|                  | dye       |                                                                                   |                    | -N-H |       |              |
| Ph-azo-<br>PhAmi | azo dye   |  | MAPbI <sub>3</sub> | -N-H | 20.85 | This<br>work |
|                  |           |                                                                                   |                    | -C=O |       |              |

**Table S2.** The fitting results of the TRPL and EIS measurements of perovskite films with and without Ph-azo-Ph.

| Samples              | A <sub>1</sub> (cnts) | τ <sub>1</sub> (ns) | A <sub>2</sub> (cnts) | τ <sub>2</sub> (ns) | τ <sub>ave</sub> | R <sub>s</sub> | R <sub>ct</sub> |
|----------------------|-----------------------|---------------------|-----------------------|---------------------|------------------|----------------|-----------------|
| without Ph-azo-PhAmi | 437.83                | 4.63                | 292.44                | 67.716              | 61.85            | 2.04           | 4130            |
| with Ph-azo-PhAmi    | 337.77                | 141.28              | 237.03                | 6.32                | 137.22           | 0.36           | 6460            |

## References

1. X. Li, C.-C. Chen, M. Cai, X. Hua, F. Xie, X. Liu, J. Hua, Y.-T. Long, H. Tian and L. Han, *Adv. Energy Mater.*, 2018, **8**, 1800715.
2. Y. Zhou, H. Zhong, J. Han, M. Tai, X. Yin, M. Zhang, Z. Wu and H. Lin, *J. Mater. Chem. A*, 2019, **7**, 26334-26341.
3. M. Zhang, M. Tai, X. Li, X. Zhao, H. Chen, X. Yin, Y. Zhou, Q. Zhang, J. Han, N. Wang and H. Lin, *Sol. RRL*, 2019, **3**, 1900345.
4. W. Zhang, J. Xiong, J. Li and W. A. Daoud, *Adv. Energy Mater.*, 2021, **11**, 2003585.
5. M. Guo, C.-Y. Lin, S.-J. Liou, Y. J. Chang, Y. Li, J. Li and M. Wei, *J. Mater.*

- Chem. A*, 2021, **9**, 25086-25093.
6. Y. Li, F. Wu, M. Han, Z. Li, L. Zhu and Z. a. Li, *ACS Energy Lett.*, 2021, **6**, 869-876.
  7. B. Wang, N. Li, L. Yang, C. Dall'Agnese, A. K. Jena, T. Miyasaka and X.-F. Wang, *J. Am. Chem. Soc.*, 2021, **143**, 14877-14883.
  8. P. Chen, X. Yin, W.-H. Chen, L. Song, P. Du, Y. Huang, N. Li and J. Xiong, *Sustainable Energy Fuels*, 2021, **5**, 2266-2272.
  9. Z. Feng, Z. Wu, Y. Hua, C. Weng, X. Chen and S. Huang, *ACS Appl. Mater. Interfaces*, 2022, **14**, 14388-14399.
  10. J. Guo, J. Sun, L. Hu, S. Fang, X. Ling, X. Zhang, Y. Wang, H. Huang, C. Han, C. Cazorla, Y. Yang, D. Chu, T. Wu, J. Yuan and W. Ma, *Adv. Energy Mater.*, 2022, **12**, 2200537.
  11. S. Liu, R. Chen, X. Tian, Z. Yang, J. Zhou, F. Ren, S. Zhang, Y. Zhang, M. Guo, Y. Shen, Z. Liu and W. Chen, *Nano Energy*, 2022, **94**, 106935.
  12. Z. Sun, N. Gu, Y. Feng, L. Song, P. Du, H. Jiang and J. Xiong, *Dalton Trans.*, 2023, **52**, 1702-1710.
